# Supplementary material for: One-pot, large-scale synthesis of SnO2 nanotubes at room temperature
Source: Royal Society of Chemistry journal article supplement (doi:10.1039/b800401c), 2008-01-01
Supplement: b800401c.pdf [file b800401c.pdf]

## Supplementary Information

# One-pot Synthesis of SnO<sub>2</sub> Nanotubes Based on Nanoscale Kirkendall Effect at Room Temperature

Ning Du, Hui Zhang, Bingdi Chen, Xiangyang Ma, Deren Yang\*

State Key Lab of Silicon Materials and Department of Material Science and Engineering, Zhejiang University, Hangzhou 310027, People's Republic of China

### Experimental section

All the chemicals used were analytical grade without further purification. 0.5 ml PDDA (20% Wet.) and 0.1g NaBH<sub>4</sub> were dissolved in 60 ml deionized water. Such a mixed solution was dropwise added with 30 ml SnCl<sub>4</sub> solution containing 0.18 g SnCl<sub>4</sub> at room temperature. The product was collected by the burette when the reaction time was 5min, 30min and 12h, respectively. The resulting solid products were successively centrifuged, washed with the deionized water and ethanol to remove the ions possibly remaining in the final products, and finally dried at 60 °C in air. In order to change the size of the resulting SnO<sub>2</sub> nanotubes, the volume of the added PDDA was changed while keeping other conditions as mentioned above unchanged. The product was collected by burette when the reaction time was 5min and 12h, respectively.

The obtained samples were characterized by X-ray powder diffraction (XRD) using a Japan Rigaku D/max-ga x-ray diffractometer with graphite monochromatized CuK $\alpha$  radiation ( $\lambda=1.54178\text{\AA}$ ). The morphologies of the samples were observed by transmission electron microscopy (TEM, JEM 2010 200 kV). High-resolution transmission electron microscopy (HRTEM) observation was performed on JEM 2010F operated at 300 kV. X-ray photoelectron spectroscopy (XPS) analysis was performed on an AXIS-Ultra instrument using monochromatic Al K $\alpha$  radiation (225 W, 15 mA, 15 kV) and low-energy electron flooding for charge compensation.

---

\* Author to whom correspondence should be addressed; electronic mail: mseyang@zju.edu.cn

Figure S1 shows the TEM and HRTEM images of the as synthesized SnO<sub>2</sub> nanoparticles in absence of PDDA and the corresponding XRD pattern.

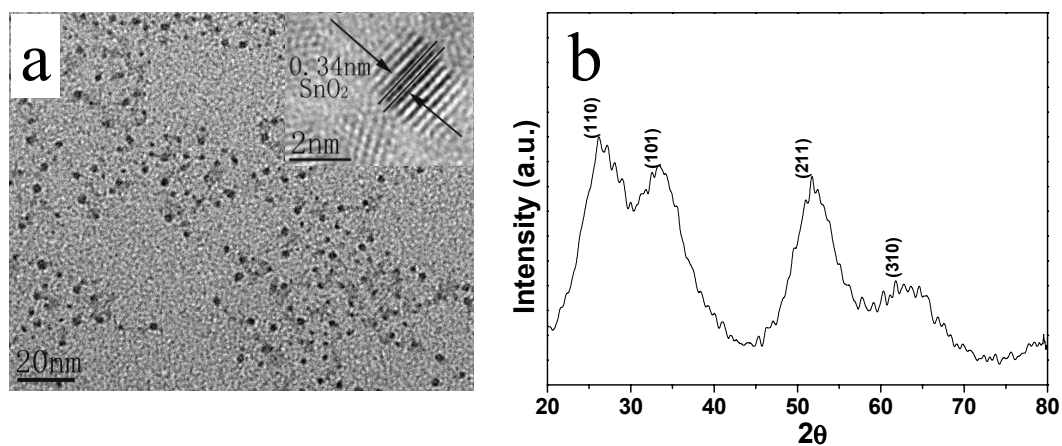

**Figure S1** a) TEM image of the as synthesized SnO<sub>2</sub> nanoparticles in absence of PDDA and the right-upper inset HRTEM image. b) XRD pattern of the as synthesized SnO<sub>2</sub> nanoparticles in absence of PDDA.

Figure S2 shows the TEM image of the as synthesized SnO<sub>2</sub> nanoparticles in presence of PSS as the soft template. Only nanoparticles can be seen in the TEM image.

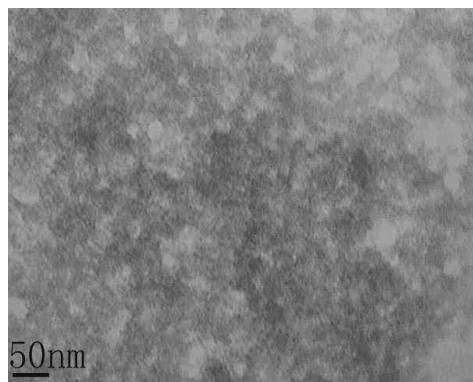

**Figure S2** TEM image of the as synthesized SnO<sub>2</sub> nanoparticles in presence of PSS as the soft template

The length of the SnO<sub>2</sub> nanotubes, determined by the length of the Sn nanorods, could be adjusted by the molar ratio of PDDA/SnCl<sub>4</sub>. As shown in figure S3, when 5 ml PDDA was used, the length of the Sn nanorods increased to 700-800 nm and the corresponding SnO<sub>2</sub> nanotubes also increased to 700-800 nm. When 0.1 ml PDDA was used, the length of the Sn nanorods decreased to 30-50 nm and the corresponding SnO<sub>2</sub> nanotubes also decreased to 30-50 nm. The results indicate that the length of the SnO<sub>2</sub> nanotubes could be controlled by the molar ratio of PDDA/SnCl<sub>4</sub>.

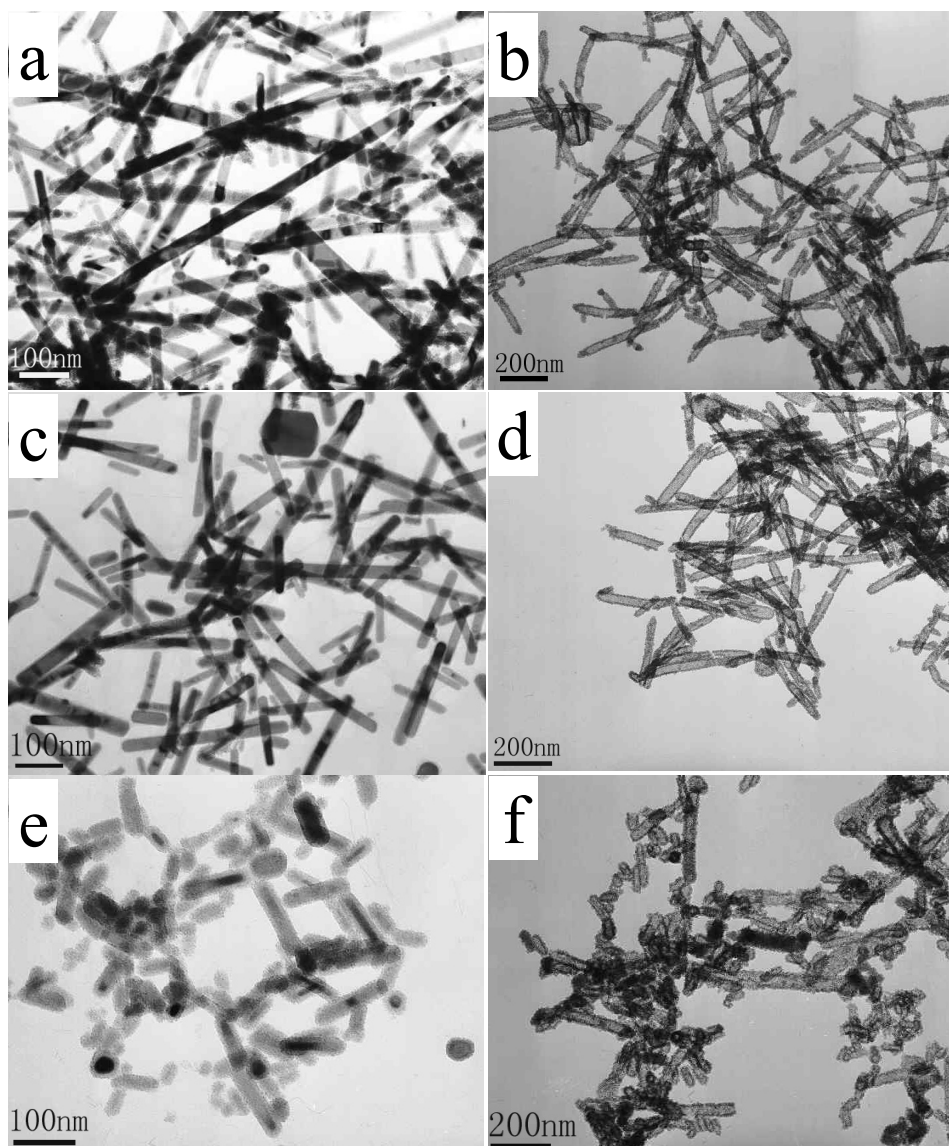

**Figure S3** TEM images of the as synthesized Sn nanorods (a,c,e) with the addition of 5, 2, and 0.1 ml PDDA, respectively and the corresponding TEM images of the SnO<sub>2</sub> nanotubes (b,d,f)

Figure S4 shows the HRTEM image of the interface between Sn and SnO<sub>2</sub> in the as-synthesized Sn/SnO<sub>2</sub> partially hollow nanotubes obtained with the reaction time of 30 min, confirming the coexistence of Sn and SnO<sub>2</sub>.

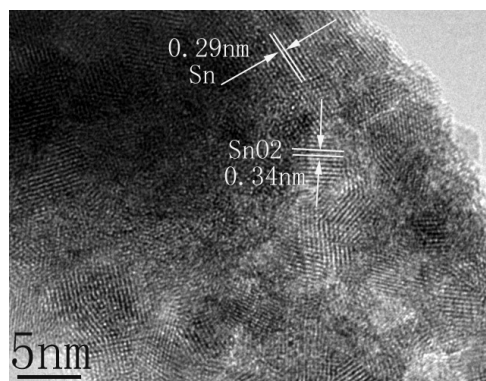

**Figure S4** HRTEM image of the interface between Sn and SnO<sub>2</sub> in the as-synthesized Sn/SnO<sub>2</sub> partially hollow nanotubes obtained with the reaction time of 30 min

Figure S5 shows the XPS spectra of the as-synthesized Sn/SnO<sub>2</sub> partially hollow nanotubes obtained with the reaction time of 30 min

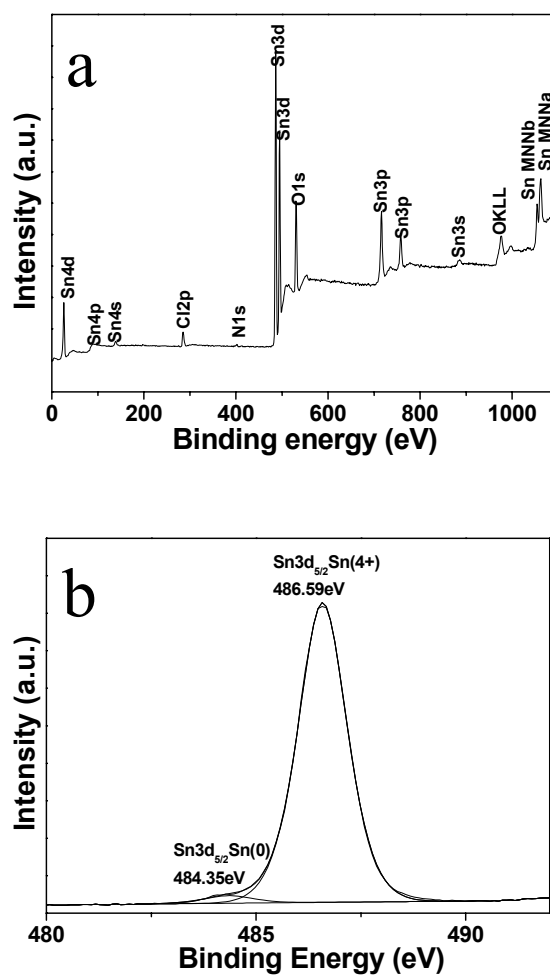

**Figure S5** XPS spectra of the as-synthesized Sn/SnO<sub>2</sub> partially hollow nanotubes obtained with the reaction time of 30 min
